# Supplementary material for: Niclosamide Targets Inflammatory and Profibrotic Pathways in Amyotrophic Lateral Sclerosis
Source: Research Square preprint supplement (doi:10.21203/rs.3.rs-138253/v1), 2021-01-05
Supplement: Supplementary file 1 [file 401b6068671c13abe832c580.docx]

**Niclosamide targets inflammatory and profibrotic pathways in**

**amyotrophic lateral sclerosis**

**Authors and affiliations**

Martina Milani1, Eleonora Mammarella1, Simona Rossi2, Serena Lattante3,4, Mario Sabatelli5,6,7, Mauro Cozzolino2, Nadia D’Ambrosi1*, Savina Apolloni1*

1Department of Biology, University of Rome "Tor Vergata", 00133 Rome, Italy; 2Institute of Translational Pharmacology, CNR, 00133 Rome, Italy; 3Unità Operativa Complessa di Genetica Medica, Fondazione Policlinico Universitario A. Gemelli IRCCS, 00168 Rome, Italy; 4Sezione di Medicina Genomica, Università Cattolica del Sacro Cuore, 00168 Rome, Italy; 5Unità Operativa Complessa di Neurologia, Fondazione Policlinico Universitario A. Gemelli IRCCS, 00168 Rome, Italy; 6Centro Clinico NEMO, Fondazione Policlinico Universitario A. Gemelli IRCCS, 00168 Rome, Italy; 7Sezione di Neurologia, Università Cattolica del Sacro Cuore, 00168 Rome, Italy.

**Running title**

Niclosamide in ALS

***Corresponding authors**

Nadia D’Ambrosi, PhD and Savina Apolloni, PhD

Department of Biology

University of Rome "Tor Vergata"

Via della Ricerca Scientifica, 1

00133 Rome, Italy

Tel: +39 0672594244

Email: [nadia.dambrosi@uniroma2.it](mailto:nadia.dambrosi@uniroma2.it)

[savina.apolloni@uniroma2.it](mailto:savina.apolloni@uniroma2.it)

**Supplementary Material**

**Figure S1. FUS and TARDBP associated mutations induce an upregulation of S100A4**

Protein lysates of fibroblasts from controls (n=3/group), and from a patient carrying the *FUS* p.R521C pathogenic variant (n=3 replicates) (**a**) or from a patient with the *TARDBP* p. Q303H and a patient with the *TARDBP* p.A382T mutations (**b**) were analysed by western blotting using anti-S100A4. GAPDH was used to normalize samples. The expression levels were calculated by densitometric analyses. Data represent mean ± SEM. Statistical significance was calculated by student’s t-test and values significantly different from controls are indicated with an asterisk when p≤0.05.

**Figure S2. S100A4 is increased in the spinal cord of hFUS mice**

(**a**) Protein from lumbar spinal cord lysates of non-transgenic (Non-Tg) and hFUS mice at end stage (n=5/group) were assayed by Western blot with anti-S100A4. GAPDH levels served as loading control. Relative densitometric values are reported on the right. Data represent mean ± SEM. Statistical significance was calculated by student’s *t*-test and significantly different values from Non-Tg are indicated with an asterisk when p≤0.05. (**b**) Representative fluorescence images of S100A4 (green) and GFAP (purple) in grey and white matter of the lumbar spinal cord from non-transgenic (Non-Tg) (~ 40 days) and end stage hFUS mice. WM = white matter. GM = grey matter. Scale bars: 50 µm.
